1 **Running Title:** Genome recombination of SARS-CoV-2 variants

2 **Keywords:** SARS-CoV-2, Genome recombination, Alpha variant, Delta variant

3

4 **Title: Genome Recombination between Delta and Alpha Variants of Severe Acute**

5 **Respiratory Syndrome Coronavirus 2 (SARS-CoV-2)**

6

7 **Authors:** Tsuyoshi Sekizuka<sup>a</sup>, Ph.D., Kentaro Itokawa<sup>a</sup>, Ph.D., Masumichi Saito, Ph.D.,

8 Michitsugu Shimatani, M.D., Shutoku Matsuyama, Ph.D., Hideki Hasegawa, M.D., Ph.D.,

9 Tomoya Saito, M.D., Ph.D., and Makoto Kuroda<sup>#</sup> Ph.D. and COVID-19 Genomic Surveillance

10 Network in Japan (COG-JP).

11 **Author Affiliations:**

12 National Institute of Infectious Diseases, Tokyo, Japan (T. Sekizuka, K. Itokawa, M. Saito, M.

13 Shimatani, S. Matsuyama, H. Hasegawa, T. Saito, M. Kuroda)

14 <sup>a</sup>These authors contributed equally to this article.

15

16 **#Corresponding Author:**

17 Makoto Kuroda, Ph.D.

18 Address for correspondence: Pathogen Genomics Center, National Institute of Infectious

19 Diseases, 1-23-1 Toyama, Shinjuku-ku, Tokyo 162-8640, Japan

20 Tel: +81-3-5285-1111

21 Fax: +81-3-5285-1166

22 E-mail: [makokuro@niid.go.jp](mailto:makokuro@niid.go.jp)

23

## 24 **Abstract**

25 Prominent genomic recombination has been observed between the Delta and Alpha variants of  
26 severe acute respiratory syndrome coronavirus 2 (SARS-CoV-2) isolated from clinical  
27 specimens in Japan. It is necessary to intensively study such marked genetic variations and  
28 characterize the emerging variants after careful verification of their lineage and clade  
29 assignment.

30

## 31 **Text**

### 32 **Ethics Statement**

33 The study protocol was approved by the National Institute of Infectious Diseases, Japan  
34 (Approval no. 1091). The ethics committee waived the requirement for written consent with  
35 respect to research on viral genome sequences.

### 36 **Course of the Study**

37 We conducted a genome surveillance of the severe acute respiratory syndrome coronavirus 2  
38 (SARS-CoV-2) with help from the local public health centers, laboratories in research institutes,  
39 commercial laboratories (1, 2), and airport quarantine stations (3). The coronavirus disease-19  
40 (COVID-19) Genomic Surveillance Network in Japan (COG-JP) has consistently monitored the  
41 prevalence of the Phylogenetic Assignment of Named Global Outbreak (PANGO) lineages of  
42 SARS-CoV-2 from the first COVID-19 case (January 15, 2020) to recent cases (September 30,  
43 2021). Until now, 120,476 domestic and 2,018 quarantine isolates have been deposited in the  
44 Global Initiative on Sharing All Influenza Data (GISAID) EpiCoV database (1, 2). Whole-  
45 genome sequences were assigned to the SARS-CoV-2 isolates ( $\geq 29$  kb genome size) obtained

46 from domestic COVID-19-positive patients in Japan (n = 120,476), according to the PANGO  
47 lineage definition (v3.1.14, 2021-09-28) (4).

## 48 **Observations and Discussions**

49 During the surveillance, we monitored several variants of concern (VOCs) of the PANGO  
50 lineage. We found six unique specimens (Fig. 1) among the 21A (Delta) clade isolates that  
51 exhibited a low quality assignment (“not determined” or “none”) in the PANGO lineage, even  
52 though their genome sequences had been completely determined with high read coverage  
53 throughout the whole genome region. A detailed genome alignment by Nextclade (5) suggested  
54 that despite being clonal isolates of the 21A (Delta) clade, these six isolates show identical  
55 mutation profiles with 20I (Alpha, V1), particularly between the *ORF6* and *N* genes, located  
56 towards the latter part of the SARS-CoV-2 genome (Fig. 1). Additionally, the alignment clearly  
57 revealed a possible recombination spot between the *ORF6* and *ORF7a* genes (Fig. 1). However,  
58 the next generation sequencing (NGS)-based read mapping analysis did not indicate the presence  
59 of any heterogeneous mix of alleles in the clinical specimens, suggesting that these patients had  
60 not acquired multiple variant infections with 21A (Delta) and 20I (Alpha, V1) clades at the acute  
61 stage of the infection (Fig. 2).

62 Interestingly, all six clinical isolates that exhibit the abovementioned recombination were  
63 detected around mid-August 2021. Even though the mutation profiles point towards the clonal  
64 nature of these six isolates (Fig. 1), there is no epidemiological link among the patients.  
65 Incidentally, the two variants, namely 21A (Delta) and 20I (Alpha), were detected in 93% and  
66 5% of the total specimens, respectively, in mid-August 2021 in Japan (6), suggesting the  
67 possibility of multi-variant infection in a single patient leading to such a recombination event.  
68 However, we have not yet identified a potential patient with mixed infection, i.e., one who has

69 tested double positive in the variant polymerase chain reaction (PCR) test. Furthermore, the  
70 number of COVID-19-positive patients has been significantly decreasing in Japan since early  
71 October 2021. In parallel, such a recombinant isolate has not been detected thus far, indicating  
72 that it might be contained compared with other domestic Delta variants.

73 A recent report by Gribble et al. demonstrated that recombination is a critical event for  
74 creating the coronavirus diversity, and RNA proofreading exoribonuclease (nsp14-ExoN) is  
75 responsible for generating the recombination frequency as well as the altered recombination  
76 products in the in vitro culture experiments (7). The report has also described eight potential  
77 recombination hotspots at the microhomologous sequence of the SARS-CoV-2 genome. In fact,  
78 one of the hotspots, which lies between *ORF6* and *ORF7a*, could be the target site responsible  
79 for the recombination event observed in the current study. Interestingly, the recombination  
80 variant detected in this study carries a spike protein identical to the one in the domestic Delta  
81 variant, thereby suggesting that further risks would not be concerned with infectivity and  
82 immune escape.

83 The detection of SARS-CoV-2 variants with *ORF7a*, *ORF7b*, and *ORF8* deletions (8-11) can  
84 explain the occurrence of the abovementioned recombination event. In fact, the hotspots around  
85 *ORF7a* can facilitate the generation of a novel isolate that exhibits different genetic profiles  
86 owing to co-infection by distinct variants in the COVID-19 patient. In addition to the six isolates  
87 mentioned in this study, we also investigated the total deposits in GISAID (by 2021-09-30) for  
88 other possible genomic recombinations. We found a USA isolate [hCoV-19/USA/MO-CDC-  
89 LC0213262/2021 (EPI\_ISL\_4164992|2021-08-07)] portraying a recombination between the  
90 Delta and Alpha variants in *ORF7a*, but we could not reconfirm the validity of the event because  
91 we were unable to obtain the raw NGS sequencing reads for analysis.

## 92 **Conclusions**

93 In conclusion, this is the first identification of a novel recombination SARS-CoV-2 variant  
94 between the 21A (Delta) and 20I (Alpha, V1) clades in domestic clinical specimens. As  
95 suggested by previous in vitro culture experiments (7), such a recombination can possibly be  
96 generated in the real world. Therefore, the simple PANGO and clade assignment might mis-  
97 identify notable variants based upon ordinary genome surveillance, and we must intensively  
98 monitor and carefully inspect such marked genetic variations to ensure their proper  
99 characterization.

100

## 101 **Acknowledgments**

102 We would like to thank Rina Tanaka, Satsuki Eto, Risa Someno, Akina Ogamino, Naomi  
103 Nojiri, Hazuka Yoshida, Tomoko Ishihara, Tadaki Suzuki and Nozomi Takeshita for the whole-  
104 genome sequencing and data curation of the SARS-CoV-2 specimens. This work was supported  
105 by a Grant-in-Aid from the Japan Agency for Medical Research and the Development Research  
106 Program on Emerging and Re-emerging Infectious Diseases (JP21fk0108103) and a grant from  
107 the Ministry of Health, Labor, and Welfare, Japan (19HA1001 and 20HA2007). Finally, we  
108 would like to thank all the researchers who have deposited and shared genomic data of SARS-  
109 CoV-2 on GISAID.

110

111 **Disclaimers:** The opinions expressed by the authors contributing to this article do not  
112 necessarily reflect the opinions of the Centers for Disease Control and Prevention or the  
113 institutions with which the authors are affiliated.

114

115 **Data availability**

116 Raw NGS sequencing reads have been deposited in the DNA Data Bank of Japan (DDBJ;  
117 accession number: DRA012825), as shown in the Table.

118

119 **Author Bio**

120 Dr. Tsuyoshi Sekizuka is a chief at the National Institute of Infectious Diseases in  
121 Shinjuku-ku, Tokyo, Japan. His main research interest is pathogen genomics.

122

123 **References**

- 124 1. Itokawa K, Sekizuka T, Hashino M, Tanaka R, Kuroda M. Disentangling primer  
125 interactions improves SARS-CoV-2 genome sequencing by multiplex tiling PCR. *PLoS One*.  
126 2020;15(9):e0239403.
- 127 2. Sekizuka T, Itokawa K, Hashino M, Kawano-Sugaya T, Tanaka R, Yatsu K, et al. A  
128 Genome Epidemiological Study of SARS-CoV-2 Introduction into Japan. *mSphere*. 2020  
129 November 11;5(6):e00786-20.
- 130 3. Sekizuka T, Itokawa K, Yatsu K, Tanaka R, Hashino M, Kawano-Sugaya T, et al.  
131 COVID-19 genome surveillance at international airport quarantine stations in Japan. *J Travel*  
132 *Med*. 2021 Feb 23;28(2):taaa217.
- 133 4. Rambaut A, Holmes EC, O'Toole A, Hill V, McCrone JT, Ruis C, et al. A dynamic  
134 nomenclature proposal for SARS-CoV-2 lineages to assist genomic epidemiology. *Nat*  
135 *Microbiol*. 2020 Nov;5(11):1403-7.
- 136 5. Hadfield J, Megill C, Bell SM, Huddleston J, Potter B, Callender C, et al. Nextstrain:  
137 real-time tracking of pathogen evolution. *Bioinformatics*. 2018 Dec 1;34(23):4121-3.

- 138 6. outbreak.info. <https://outbreakinfo/location-reports?loc=JPN>. 2021.
- 139 7. Gribble J, Stevens LJ, Agostini ML, Anderson-Daniels J, Chappell JD, Lu X, et al. The  
140 coronavirus proofreading exoribonuclease mediates extensive viral recombination. *PLoS Pathog.*  
141 2021 Jan;17(1):e1009226.
- 142 8. Addetia A, Xie H, Roychoudhury P, Shrestha L, Loprieno M, Huang ML, et al.  
143 Identification of multiple large deletions in ORF7a resulting in in-frame gene fusions in clinical  
144 SARS-CoV-2 isolates. *J Clin Virol.* 2020 Aug;129:104523.
- 145 9. Tse H, Wong SC, Ip KF, Cheng VC, To KK, Lung DC, et al. Genome Sequences of  
146 Three SARS-CoV-2 ORF7a Deletion Variants Obtained from Patients in Hong Kong. *Microbiol*  
147 *Resour Announc.* 2021 Apr 15;10(15).
- 148 10. Mazur-Panasiuk N, Rabalski L, Gromowski T, Nowicki G, Kowalski M, Wydmanski W,  
149 et al. Expansion of a SARS-CoV-2 Delta variant with an 872 nt deletion encompassing ORF7a,  
150 ORF7b and ORF8, Poland, July to August 2021. *Euro Surveill.* 2021 Sep;26(39).
- 151 11. Neches RY, Kyrpides NC, Ouzounis CA. Atypical Divergence of SARS-CoV-2 Orf8  
152 from Orf7a within the Coronavirus Lineage Suggests Potential Stealthy Viral Strategies in  
153 Immune Evasion. *mBio.* 2021 Jan 19;12(1).

154

155

156

**Table: Summary information of the recombination variant isolates of SARS-CoV-2 <sup>1</sup>**

| Isolate   | Sampling date (yyyy-mm) | Clade       | Lineage (PANGOLIN <sup>2</sup> , 2021-09-28) | GISAID <sup>3</sup> ID | NGS <sup>4</sup> raw reads (fastq) |
|-----------|-------------------------|-------------|----------------------------------------------|------------------------|------------------------------------|
| PG-107020 | 2021-08                 | 21A (Delta) | None                                         | EPI_ISL_4882472        | DRR321268                          |
| PG-113440 | 2021-09                 | 21A (Delta) | None                                         | EPI_ISL_4882473        | DRR321269                          |
| PG-133737 | 2021-08                 | 21A (Delta) | None                                         | EPI_ISL_4882477        | DRR321273                          |
| PG-122116 | 2021-08                 | 21A (Delta) | None                                         | EPI_ISL_4882474        | DRR321270                          |
| PG-128229 | 2021-08                 | 21A (Delta) | None                                         | EPI_ISL_4882476        | DRR321272                          |
| PG-126853 | 2021-08                 | 21A (Delta) | None                                         | EPI_ISL_4882475        | DRR321271                          |

<sup>[1]</sup> SARS-CoV-2: Severe acute respiratory syndrome coronavirus 2

<sup>[2]</sup> PANGOLIN: Phylogenetic Assignment of Named Global Outbreak Lineages

<sup>[3]</sup> GISAID: Global Initiative on Sharing All Influenza Data

<sup>[4]</sup> NGS: Next generation sequencing

157

158

159

160



161

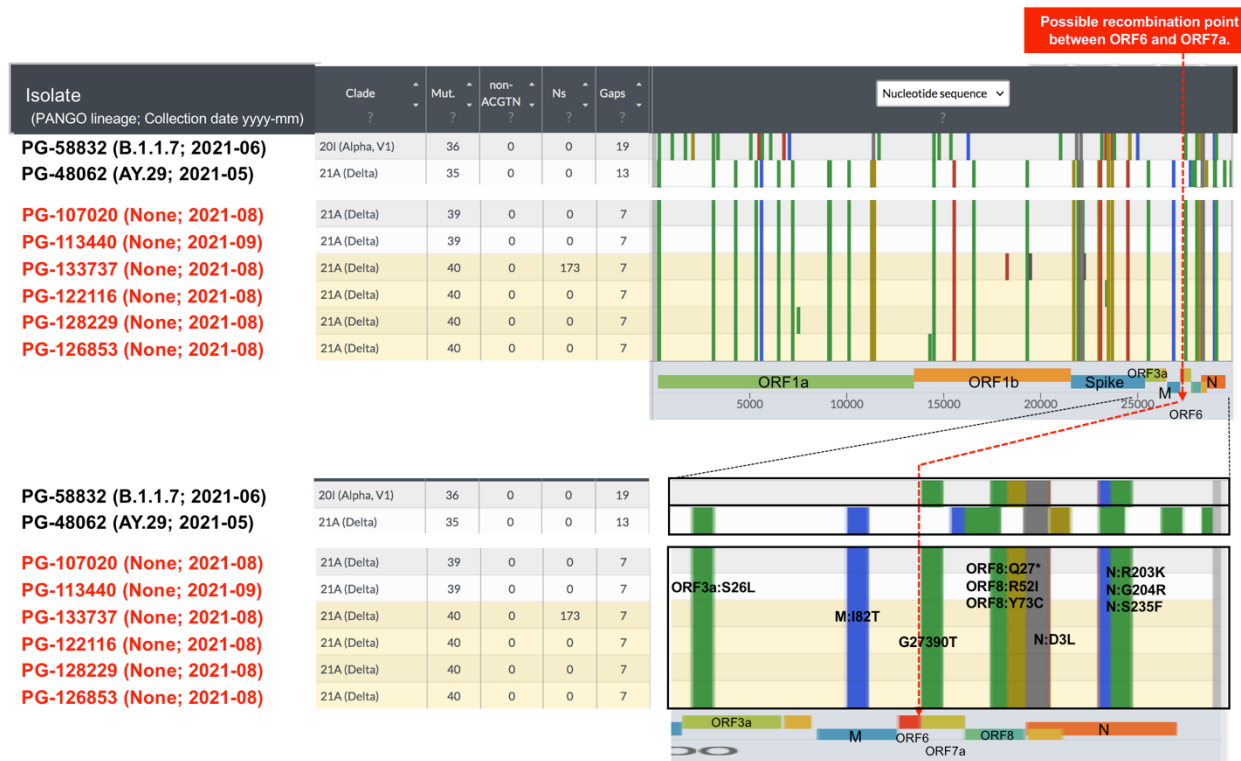

162

163 **Figure 1.** Clade assignment and pair-wise genome alignment of severe acute respiratory  
 164 syndrome coronavirus 2 (SARS-CoV-2) samples were performed using Nextclade analysis (5).  
 165 In a comparison with the control for B.1.1.7 Alpha variant (PG-58832) and B.1.617.2 Delta  
 166 variant (PG-48062), Nextclade alignment showed that six isolates (highlighted in red) have been  
 167 assigned in the 21A (Delta) clade, but their mutation profiles after the *ORF7a* gene suggest  
 168 identical profiling with the B.1.1.7 Alpha variant (PG-58832). The possible recombination point  
 169 is shown as red broken line.

170

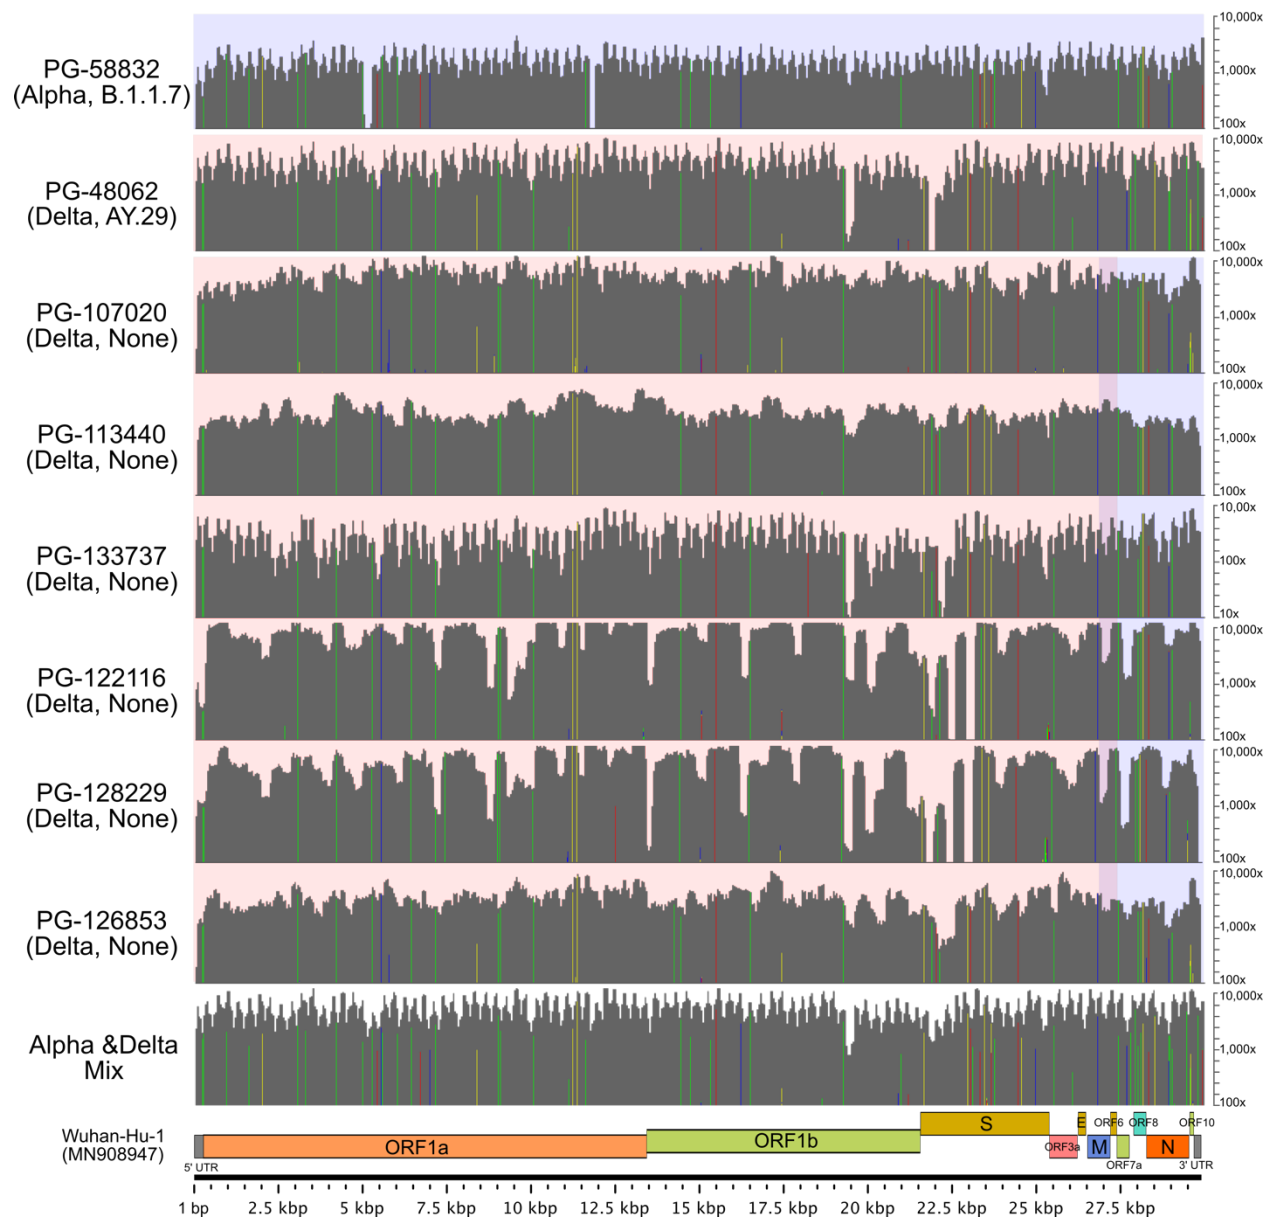

**Figure 2. Read mapping analysis of the severe acute respiratory syndrome coronavirus 2 (SARS-CoV-2) recombination isolates**

The new generation sequencing (NGS) reads were mapped to the whole genome sequence of Wuhan-Hu-1 (GenBank ID: MN908947), and the mutation profile of each isolate was compared using control isolates (PG-58832, Alpha B.1.1.7; PG-48062, Delta AY.29). A background color in dark blue and light red is indicated for the genome region corresponding to the Alpha and Delta variants, respectively. Detected nucleotide variations are highlighted with a vertical line

179 (A: red, G: yellow, C: blue, and T: green) on the read mapping area in dark gray. Co-infection  
180 samples with Alpha and Delta variants were prepared virtually for comparison.
